# Supplementary material for: Preliminary Scales for ICD-11 Personality Disorder: Self and Interpersonal Dysfunction Plus Five Personality Disorder Trait Domains
Source: PubMed Central journal article supplement (PMC8311289; doi:10.3389/fpsyg.2021.668724), 2021-07-12
Supplement: Table_1.pdf [file Table_1.pdf]

## Supplemental Table 1

*A Priori Rational Domains and Components/ Subcomponents of the ICD-11 Personality Disorder Model: Outline Derived from the Clinical Description and Diagnostic Guidelines*

| Domain                    | Components                                                                                                                                                                                                                                                                                                                                                                                                                                                                                                                                                                                                                                                                                                                                            |
|---------------------------|-------------------------------------------------------------------------------------------------------------------------------------------------------------------------------------------------------------------------------------------------------------------------------------------------------------------------------------------------------------------------------------------------------------------------------------------------------------------------------------------------------------------------------------------------------------------------------------------------------------------------------------------------------------------------------------------------------------------------------------------------------|
|                           | Core Personality Dysfunction <sup>a</sup>                                                                                                                                                                                                                                                                                                                                                                                                                                                                                                                                                                                                                                                                                                             |
| Self Dysfunction          | Disturbance in stability/ coherence of one's sense of identity<br>Sense of self variable/inconsistent or overly rigid/fixed<br>Low ability to maintain a positive sense of self-worth<br>Low accuracy of one's view of one's characteristics, strengths and weaknesses (overly positive or negative)<br>Low capacity for self-direction (low ability to plan, choose, and implement appropriate goals)                                                                                                                                                                                                                                                                                                                                                |
| Interpersonal Dysfunction | Disturbance in multiple types of interpersonal relationships<br>Low interest in engaging in interpersonal relationships<br>Dysfunctional interest in interpersonal relationships (e.g., desperate need to have and hold relationships)<br>Low ability to understand and appreciate others' perspectives<br>Low ability to develop and maintain close relationships<br>Low ability to manage conflict in relationships                                                                                                                                                                                                                                                                                                                                 |
|                           | Personality Disorder Trait Qualifiers                                                                                                                                                                                                                                                                                                                                                                                                                                                                                                                                                                                                                                                                                                                 |
| Negative Affectivity      | Experience of a broad range of negative emotions frequently and out of proportion to the situation<br>Anxiety/ worry/ fear<br>Depression/ vulnerability<br>Anger/ hostility<br>Guilt/ shame<br>Emotional lability and poor emotion regulation<br>Overreactivity to negative cognitions and external events<br>Rumination of flaws, past mistakes, future problems<br>Low frustration tolerance<br>Emotional fluctuation or simultaneous mixed emotions<br>Difficulty self-soothing<br>Negativistic attitudes<br>Responds negatively to advice and suggestions<br>Pessimism/ hopelessness<br>Resourcelessness/ helplessness<br>Low self-esteem /self-confidence<br>Avoidance of things judged to be too difficult<br>Dependency<br>Envy<br>Suicidality |

(table continues)

Supplemental Table 1 (cont.)

| Domain                        | Components                                                                                                                                                                                                                                                                                                                                                                                                                                                                                                                                                                                                                                                                                                                                                                                                                                                                                  |
|-------------------------------|---------------------------------------------------------------------------------------------------------------------------------------------------------------------------------------------------------------------------------------------------------------------------------------------------------------------------------------------------------------------------------------------------------------------------------------------------------------------------------------------------------------------------------------------------------------------------------------------------------------------------------------------------------------------------------------------------------------------------------------------------------------------------------------------------------------------------------------------------------------------------------------------|
| (Negative Affectivity, cont.) | <p>Mistrustfulness</p> <ul style="list-style-type: none"> <li>Suspiciousness./ distrustful of others' intentions</li> <li>Easily slighted or insulted</li> <li>Holds grudges</li> <li>Bitterness/ cynicism</li> </ul>                                                                                                                                                                                                                                                                                                                                                                                                                                                                                                                                                                                                                                                                       |
| Detachment                    | <p>Social detachment</p> <ul style="list-style-type: none"> <li>Avoidance of social interactions, contact, and situations</li> <li>Avoidance of intimacy/ intimate relationships</li> <li>Lack of friendships or even acquaintances</li> <li>Lack of interest in sexual relations</li> <li>Lack of enjoyment in social interactions</li> </ul> <p>Emotional detachment</p> <ul style="list-style-type: none"> <li>Reserve, aloofness</li> <li>Keep to themselves even in social situations</li> <li>Limited emotion expression, both verbally and non-verbally</li> <li>Non-reactive to negative or positive events</li> <li>Limited emotional experience, lack of feeling(s)</li> <li>Limited capacity for enjoyment</li> </ul>                                                                                                                                                            |
| Dissociality                  | <p>Self-centeredness</p> <ul style="list-style-type: none"> <li>Sense of entitlement (i.e., preferentially deserve what they want without explanation or justification)</li> <li>Overly positive view of self (e.g., have admirable qualities, outstanding accomplishments, greatness) →</li> <li>Expectations of admiration</li> <li>Attention seeking, with negative behavior absent attention</li> <li>Focused on own needs, desires, or comfort</li> <li>Oblivious to others' needs, desires, or comfort</li> </ul> <p>Low empathy</p> <ul style="list-style-type: none"> <li>Lack of caring; callousness to others' suffering; in the extreme, take pleasure in inflicting pain/ harm</li> <li>Manipulativeness/ deceitfulness</li> <li>Exploitative for personal gain</li> <li>Aggressiveness/ meanness</li> <li>Ruthlessness in goal-seeking</li> <li>Unprovoked violence</li> </ul> |
| Disinhibition                 | <p>Impulsivity</p> <ul style="list-style-type: none"> <li>Rash behavior, with no regard for consequences, risk level</li> <li>Difficulty delaying gratification</li> <li>Pursuit of immediate pleasure</li> </ul> <p>Distractibility</p> <ul style="list-style-type: none"> <li>Difficulty sustaining attention</li> <li>Quickly bored/ frustrated by tedious/ difficult tasks</li> <li>Easily attracted by extraneous stimuli</li> <li>Scan environment for attractive alternatives</li> </ul>                                                                                                                                                                                                                                                                                                                                                                                             |

*(table continues)*

Supplemental Table 1 (cont.)

| Domain                 | Components                                                                                                                                                                                                                                                                                                                                                                                                                                                                                                                                                                                                                                                                   |
|------------------------|------------------------------------------------------------------------------------------------------------------------------------------------------------------------------------------------------------------------------------------------------------------------------------------------------------------------------------------------------------------------------------------------------------------------------------------------------------------------------------------------------------------------------------------------------------------------------------------------------------------------------------------------------------------------------|
| (Disinhibition, cont.) | Irresponsibility, unreliability, low sense of accountability<br>Failure to meet expectations in completeness, timeliness<br>Lack of follow-through on commitments, promises<br>Late to appointments/ meetings<br>Recklessness/ low cautiousness<br>Engage in activities that put self and others in danger<br>Overestimate own abilities and fail to consider safety risks<br>Low planning/ preference for spontaneity<br>Prefer having option to pursue attractive opportunities<br>Low attention to goal setting<br>Failure to follow through on plans<br>Failure to meet goals                                                                                            |
| Anankastia             | Perfectionism, rigidly expected from self and others<br>Hyperconcern with rules, obligations, morality<br>Scrupulous attention to detail<br>Hyperemphasis on systems, routines, and schedules<br>Hyperemphasis organization, orderliness, neatness<br>Perseveration due to pursuit of perfection<br>Clear, detailed personal ideas of perfection applied to all<br>Emotional and behavioral constraint (both self and others)<br>Rigidly controlled emotional expression<br>Disapprove of others' displays of emotion<br>Stubbornness, inflexibility,<br>Averse to risk and uncertainty (due to lack of control)<br>Difficulty decision making, due to hyperdeliberativeness |

<sup>a</sup>Core personality dysfunction has emotional, cognitive, and behavioural manifestations. For example, emotional manifestations include restricted or extreme range of, or inappropriateness of, emotional experience and expression; under- or overreactivity, over- or underawareness of emotions. Cognitive manifestations include, for example, inaccuracy of situational and/or interpersonal appraisals; inappropriate decision-making, particular in situations of uncertainty; and/or highly unstable or overly rigid beliefs systems. Behavioural manifestations include, for example, inappropriate modulation of behavior based on the situation and potential consequences, and inappropriate behavioural responses to intense emotions and stressful situations.

Supplemental Table 2

Existing measures of the ICD-11 Personality Disorder Model Based on the PID-5

| Bach et al. (2017) <sup>a</sup><br>Name: None<br>Selected PID-5 facets<br>143 items – 16 facets<br>(Items per facet) | Sellbom et al. (2020) <sup>a</sup><br>Name: None<br>Selected PID-5 facets<br>158 items – 18 facets<br>(Items per facet) | Kerber et al. (2020)<br>Name: PID-5-BF+ <sup>b</sup><br>Selected PID-5 items<br>34 items – 17 facets<br>Items per facet: 2 | Bach et al. (2020)<br>Name: Modified PID-5-BF+ <sup>c</sup><br>Selected PID-5 items<br>36 items – 18 facets<br>Items per facet: 2 | Bach & El Abiddine (2020)<br>Name: None<br>PID-5-BF (APA, 2013)<br>25 items<br>1 item per facet unless noted |
|----------------------------------------------------------------------------------------------------------------------|-------------------------------------------------------------------------------------------------------------------------|----------------------------------------------------------------------------------------------------------------------------|-----------------------------------------------------------------------------------------------------------------------------------|--------------------------------------------------------------------------------------------------------------|
| <b>Negative Affectivity</b>                                                                                          |                                                                                                                         |                                                                                                                            |                                                                                                                                   |                                                                                                              |
| Emotional lability (7)<br>Anxiousness (9)                                                                            | Emotional lability (7)<br>Anxiousness (9)                                                                               | Emotional lability<br>Anxiousness<br>Separation Insecurity                                                                 | Emotional lability<br>Anxiousness<br>Separation Insecurity                                                                        | Emotional lability<br>Anxiousness<br>Separation Insecurity                                                   |
| Depressivity (14)<br>Hostility (10)                                                                                  | Depressivity (14)<br>Hostility (10)<br>Suspiciousness <sup>e</sup> (7)                                                  |                                                                                                                            |                                                                                                                                   | Depressivity <sup>d</sup><br>Hostility                                                                       |
| <b>Detachment</b>                                                                                                    |                                                                                                                         |                                                                                                                            |                                                                                                                                   |                                                                                                              |
| Withdrawal (10)<br>Intimacy Avoidance (6)                                                                            | Withdrawal (10)<br>Intimacy Avoidance (6)                                                                               | Withdrawal<br>Intimacy Avoidance<br>Anhedonia                                                                              | Withdrawal<br>Intimacy Avoidance<br>Anhedonia                                                                                     | Withdrawal (2)<br>Intimacy Avoidance <sup>d</sup><br>Anhedonia <sup>d</sup>                                  |
| Restricted Affectivity (7)                                                                                           | Restricted Affectivity (7)                                                                                              |                                                                                                                            |                                                                                                                                   |                                                                                                              |
| <b>Dissociality (Antagonism)</b>                                                                                     |                                                                                                                         |                                                                                                                            |                                                                                                                                   |                                                                                                              |
| Grandiosity (6)<br>Manipulativeness (5)                                                                              | Grandiosity (6)<br>Manipulativeness (5)                                                                                 | Grandiosity<br>Manipulativeness<br>Deceitfulness                                                                           | Grandiosity<br>Manipulativeness<br>Deceitfulness                                                                                  | Grandiosity <sup>d</sup><br>Manipulativeness<br>Deceitfulness                                                |
| Callousness (14)                                                                                                     | Callousness (14)<br>Attention Seeking <sup>f</sup> (8)                                                                  |                                                                                                                            |                                                                                                                                   | Callousness<br>Attention Seeking <sup>e</sup>                                                                |

(table continues)

Supplemental Table 2 (cont.)

| Bach et al. (2017) <sup>a</sup><br>Name: None<br>Selected PID-5 facets<br>143 items – 16 facets<br>(Items per facet) | Sellbom et al. (2020) <sup>a</sup><br>Name: None<br>Selected PID-5 facets<br>158 items – 18 facets<br>(Items per facet) | Kerber et al. (2020)<br>Name: PID-5-BF+ <sup>b</sup><br>Selected PID-5 items<br>34 items – 17 facets<br>Items per facet: 2 | Bach et al. (2020)<br>Name: Modified PID-5-BF+ <sup>c</sup><br>Selected PID-5 items<br>36 items – 18 facets<br>Items per facet: 2 | Bach & El Abiddine (2020)<br>Name: None<br>PID-5-BF (APA, 2013)<br>25 items<br>1 item per facet unless noted |
|----------------------------------------------------------------------------------------------------------------------|-------------------------------------------------------------------------------------------------------------------------|----------------------------------------------------------------------------------------------------------------------------|-----------------------------------------------------------------------------------------------------------------------------------|--------------------------------------------------------------------------------------------------------------|
| <b>Disinhibition</b>                                                                                                 |                                                                                                                         |                                                                                                                            |                                                                                                                                   |                                                                                                              |
| Impulsivity (6)                                                                                                      | Impulsivity (6)                                                                                                         | Impulsivity                                                                                                                | Impulsivity                                                                                                                       | Impulsivity (2)                                                                                              |
| Irresponsibility (7)                                                                                                 | Irresponsibility (7)                                                                                                    | Irresponsibility                                                                                                           | Irresponsibility                                                                                                                  | Irresponsibility                                                                                             |
| Distractibility (9)                                                                                                  | Distractibility (9)                                                                                                     | Distractibility                                                                                                            | Distractibility                                                                                                                   | Distractibility <sup>d</sup>                                                                                 |
| Risk-taking (14)                                                                                                     | Risk-taking (14)                                                                                                        |                                                                                                                            |                                                                                                                                   | Risk-taking                                                                                                  |
| <b>Anankastia</b>                                                                                                    |                                                                                                                         |                                                                                                                            |                                                                                                                                   |                                                                                                              |
| Rigid Perfectionism (10)                                                                                             | Rigid Perfectionism (10)                                                                                                | Rigid Perfectionism                                                                                                        | Perfectionism <sup>g</sup>                                                                                                        |                                                                                                              |
| Perseveration (9)                                                                                                    | Perseveration (9)                                                                                                       | Perseveration                                                                                                              | Rigidity <sup>g</sup>                                                                                                             |                                                                                                              |
|                                                                                                                      |                                                                                                                         |                                                                                                                            | Orderliness <sup>g</sup>                                                                                                          |                                                                                                              |

*Note.* ICD-11 = International Classification of Diseases, 11<sup>th</sup> Ed. (World Health Organization, 2020); PID-5 = Personality Inventory for DSM-5; BF+ = Brief Form Plus. The 4-item Submissiveness facet of the Alternative Model for Personality Disorders (AMPD) is not included in any of the above measures. The AMPD's Psychoticism Domain is not included because it is not part of the ICD-11 PD model.

<sup>a</sup>When also assessing the AMPD, the entire 220-item PID-5 is administered and the ICD-11 PD model is scored from the listed facets. <sup>b</sup>Not based on the American Psychiatric Association (APA)'s 25-item PID-5-BF. <sup>c</sup>Modified version of the PID-5-BF+, not the APA's PID-5-BF.

<sup>d</sup>Translated item for this facet did not load > .35 on any factor. <sup>e</sup>Translated item for this facet loaded .45 on Negative Affectivity. <sup>f</sup>Included only in Sellbom et al. (2020) based on the final ICD-11 model. <sup>g</sup>Bach et al. (2020) included three Anankastia facets based on the original 37-facet model of the AMPD. For Perfectionism, the two items selected by Kerber et al. (2020) items were used; for Rigidity, the only two items in the PID-5 item pool that tapped Rigidity were used; for Orderliness, four possible PID-5 items were identified and the two with the strongest psychometric characteristics were selected.

Supplemental Table 3

*One-Factor Principal Axis Factor Analysis of ICD-11 PD-Severity Component Scales*

| Domain | Component                 | Personality Pathology |
|--------|---------------------------|-----------------------|
| SP     | Identity                  | <b>.80</b>            |
| SP     | Low Self-directedness     | <b>.72</b>            |
| IP     | Relationship Difficulties | <b>.67</b>            |
| SP     | Low Self-accuracy         | <b>.66</b>            |
| SP     | Low Self-worth            | <b>.65</b>            |
| IP     | Dysfunctional engagement  | .28                   |

*Note.*  $N = 383$  community adults. *ICD-11* = International Classification of Diseases, 11<sup>th</sup> Ed. (World Health Organization, 2020); PD= Personality Disorder; SP = Self Dysfunction; IP = Interpersonal Dysfunction.

Factor loadings  $\geq .40$  are **bolded**; those  $< .40$  and  $\geq .30$  are *italicized*.

Supplemental Table 4

*One-Factor Principal Axis Factor Analysis of ICD-11 PD-Trait Component Scales*

| Domain | Component            | PD Trait Pathology |
|--------|----------------------|--------------------|
| NA     | Negative Outlook     | <b>.80</b>         |
| DET    | Social Detachment    | <b>.74</b>         |
| NA     | Emotional Lability   | <b>.67</b>         |
| DET    | Emotional Detachment | <b>.67</b>         |
| NA     | Mistrust             | <b>.63</b>         |
| ANK    | Hypercontrol         | <b>.62</b>         |
| DSN    | Distractibility      | <b>.59</b>         |
| ANK    | Perfectionism        | .25                |
| DSN    | Reckless Impulsivity | .10                |
| DSL    | Low Empathy          | .35                |
| DSL    | Entitled Superiority | -.04               |

*Note.*  $N = 383$  community adults. *ICD-11* = International Classification of Diseases, 11<sup>th</sup> Ed. (World Health Organization, 2020); PD= Personality Disorder; NA = Negative Affectivity; DET = Detachment; ANK = Anankastia; DSN = Disinhibition; DSL = Dissociality.

Factor loadings  $\geq .40$  are **bolded**; those  $< .40$  and  $\geq .30$  are *italicized*.

## Supplemental Table 5

*One-Factor Principal Axis Factor Analysis of  
ICD-11 PD-Severity and Trait Component Scales*

| Domain | Facet                     | Personality Pathology<br>Severity and Traits |
|--------|---------------------------|----------------------------------------------|
| NA     | Negative Outlook          | <b>.87</b>                                   |
| ID     | Relationship Difficulties | <b>.77</b>                                   |
| SD     | Low Self-directedness     | <b>.74</b>                                   |
| NA     | Emotional Lability        | <b>.72</b>                                   |
| DET    | Social Detachment         | <b>.71</b>                                   |
| SD     | Low Self-worth            | <b>.71</b>                                   |
| SD     | Identity Problems         | <b>.70</b>                                   |
| DSN    | Distractibility           | <b>.68</b>                                   |
| DET    | Emotional Detachment      | <b>.64</b>                                   |
| NA     | Mistrust                  | <b>.60</b>                                   |
| SD     | Low Self-accuracy         | <b>.54</b>                                   |
| ANK    | Hypercontrol              | <b>.54</b>                                   |
| ID     | Dysfunctional Engagement  | <b>.45</b>                                   |
| DSN    | Reckless Impulsivity      | .17                                          |
| DSL    | Low Empathy               | .30                                          |
| DSL    | Entitled Superiority      | -.08                                         |
| ANK    | Perfectionism             | .16                                          |

*Note.*  $N = 383$  community adults. *ICD-11* = International Classification of Diseases, 11<sup>th</sup> Ed. (World Health Organization, 2020); PD= Personality Disorder; NA = Negative Affectivity; ID = Interpersonal Dysfunction; SD = Self Dysfunction; DET = Detachment; DSN = Disinhibition; PP = Perseverance and Planning; ANK = Anankastia; DSL = Dissociality.

Factor loadings  $\geq .40$  are **bolded**; those  $< .40$  and  $\geq .30$  are *italicized*.

## Supplemental Table 6

*Promax-Rotated Two-Factor Principal Axis Factor Analyses of ICD-11 PD Trait Component Scales*

| Domain | Facet                | Internalizing | Externalizing |
|--------|----------------------|---------------|---------------|
| NA     | Negative Outlook     | <b>.80</b>    | .02           |
| DET    | Social Detachment    | <b>.76</b>    | -.10          |
| ANK    | Hypercontrol         | <b>.69</b>    | -.29          |
| NA     | Emotional Lability   | <b>.67</b>    | .01           |
| DET    | Emotional Detachment | <b>.66</b>    | .09           |
| NA     | Mistrust             | <b>.61</b>    | .12           |
| DSN    | Distractibility      | <b>.55</b>    | .24           |
| ANK    | Perfectionism        | .27           | -.11          |
| DSN    | Reckless Impulsivity | -.05          | <b>.77</b>    |
| DSL    | Low Empathy          | .21           | <b>.72</b>    |
| DSL    | Entitled Superiority | -.16          | <b>.58</b>    |

*Note.*  $N = 383$  community adults. *ICD-11* = International Classification of Diseases, 11<sup>th</sup> Ed. (World Health Organization, 2020); PD= Personality Disorder; NA = Negative Affectivity; DET = Detachment; ANK = Anankastia; DSN = Disinhibition; PP = Perseverance and Planning; DSL = Dissociality.

Factor loadings  $\geq .40$  are **bolded**; those  $< .40$  and  $\geq .30$  are *italicized*.



## Supplemental Table 7

*Promax-Rotated Two-Factor Principal Axis Factor Analyses of ICD-11 PD-Severity and Trait Component Scales*

| Domain | Facet                     | Internalizing | Externalizing |
|--------|---------------------------|---------------|---------------|
| NA     | Negative Outlook          | <b>.88</b>    | -.02          |
| ID     | Relationship Difficulties | <b>.75</b>    | .19           |
| SD     | Low Self-worth            | <b>.73</b>    | -.31          |
| SD     | Low Self-directedness     | <b>.73</b>    | .09           |
| DET    | Social Detachment         | <b>.73</b>    | -.21          |
| NA     | Emotional Lability        | <b>.73</b>    | -.09          |
| SD     | Identity Problems         | <b>.69</b>    | .13           |
| DSN    | Distractibility           | <b>.66</b>    | .21           |
| DET    | Emotional Detachment      | <b>.64</b>    | .02           |
| NA     | Mistrust                  | <b>.59</b>    | .04           |
| ANK    | Hypercontrol              | <b>.57</b>    | -.38          |
| SP     | Low Self-accuracy         | <b>.53</b>    | .17           |
| IP     | Dysfunctional engagement  | <b>.46</b>    | -.05          |
| ANK    | Perfectionism             | .18           | -.17          |
| DSN    | Reckless Impulsivity      | .10           | <b>.79</b>    |
| DSL    | Low Empathy               | .25           | <b>.66</b>    |
| DSL    | Entitled Superiority      | -.13          | <b>.55</b>    |

*Note.*  $N = 383$  community adults. *ICD-11* = International Classification of Diseases, 11<sup>th</sup> Ed. (World Health Organization, 2020). PD= Personality Disorder, NA = Negative Affectivity, IP = Interpersonal Dysfunction, SP = Self Dysfunction, DET = Detachment, DSN = Disinhibition, PP = Perseverance and Planning, ANK = Anankastia, DSL = Dissociality.

Factor loadings  $\geq .40$  are **bolded**; those  $< .40$  and  $\geq .30$  are *italicized*.

Supplemental Table 8

*Promax-Rotated Four-Factor Principal Axis Factor Analyses of  
ICD-11 PD-Severity and Trait Component Scales*

| Domain | Facet                     | Internalizing    | Internalizing | Externalizing |            |
|--------|---------------------------|------------------|---------------|---------------|------------|
|        |                           | Self Dysfunction | IP Pathology  | Traits        | Anankastia |
| SD     | Low Self-directedness     | <b>.83</b>       | .15           | -.10          | -.28       |
| NA     | Negative Outlook          | <b>.83</b>       | .08           | -.08          | .14        |
| SD     | Identity Problems         | <b>.78</b>       | -.01          | .05           | .04        |
| DSN    | Distractibility           | <b>.73</b>       | .14           | .07           | -.23       |
| SD     | Low Self-accuracy         | <b>.73</b>       | -.12          | .12           | .02        |
| SD     | Low Self-worth            | <b>.71</b>       | -.09          | -.24          | .34        |
| NA     | Emotional Lability        | <b>.62</b>       | -.06          | .04           | <b>.42</b> |
| ID     | Dysfunctional Engagement  | -.21             | <b>.92</b>    | -.02          | -.06       |
| DET    | Social Detachment         | .06              | <b>.86</b>    | -.16          | .06        |
| DET    | Emotional Detachment      | .12              | <b>.69</b>    | .06           | .02        |
| ID     | Relationship Difficulties | .36              | .39           | .30           | .24        |
| NA     | Mistrust                  | .19              | .39           | .17           | .26        |
| DSL    | Low Empathy               | -.01             | .28           | <b>.74</b>    | .03        |
| DSL    | Entitled Superiority      | -.19             | -.14          | <b>.71</b>    | .25        |
| DSN    | Reckless Impulsivity      | .33              | -.11          | <b>.68</b>    | -.29       |
| ANK    | Perfectionism             | -.16             | -.01          | .13           | <b>.67</b> |
| ANK    | Hypercontrol              | .16              | .17           | -.12          | <b>.63</b> |

*Note.*  $N = 383$  community adults. *ICD-11* = International Classification of Diseases, 11<sup>th</sup> Ed. (World Health Organization, 2020). PD= Personality Disorder, NA = Negative Affectivity, IP = Interpersonal Dysfunction, SD = Self Dysfunction, DET = Detachment, DSN = Disinhibition, PP = Perseverance and Planning, ANK = Anankastia, DSL = Dissociality.

Factor loadings  $\geq .40$  are **bolded**; those  $< .40$  and  $\geq .30$  are *italicized*.
